# Supplementary material
Source: Springer Nature journal article supplement (https://www.springermedizin.de/resource/supplementary/12963_2011_153_MOESM6_ESM.pdf/9572772)
Supplement: MOESM6 [file 9572772]

Full Dataset  
for Adult  
Module

Repeated 500 times

Random sampling  
without  
replacement by  
cause

25% test  
dataset

75% train  
dataset

Resampled with replacement  
based on uninformative Dirichlet  
draw

Tariff computed for each  
cause, for each sign/symptom

Resampled  
test dataset

Tariff  
matrix

For each death in resampled test  
dataset, scores for each cause are  
calculated by summing tariffs  
(from train dataset tariff matrix)  
for endorsed items

For each death in train  
dataset, scores for each cause  
are calculated by summing  
tariffs for endorsed items

Each cause score for each death is  
ranked relative to the  
corresponding cause score  
distribution in the train data

Training dataset is resampled  
with replacement to have a  
uniform cause distribution

Cause assignment  
decided by cause with  
highest rank  
on each death

Cause-specific mortality fraction  
accuracy and chance-corrected  
concordance computed for all  
deaths in resampled test dataset
